# Supplementary material for: Epidemiologic Features of Enterovirus 71-Associated Hand-Foot-and-Mouth Disease from 2009 to 2013 in Zhejiang, China
Source: MDPI journal article supplement (doi:10.3390/ijerph14010033), 2016-12-30
Supplement: s1 [file s1]

# Supplementary Materials: Epidemiologic Features of Enterovirus 71-Associated Hand-Foot-and-Mouth Disease from 2009 to 2013 in Zhejiang, China

Zhifang Wang, Huakun Lv, Wenming Zhu, Zhe Mo, Guangming Mao, Xiaofeng Wang, Xiaoming Lou and Yongdi Chen

**Table S1.** Number and incidence rate of EV71 severe and dead cases by age, 2009–2013.

| Age Group (ms) | 2009 |     | 2010 |      | 2011 |      | 2012 |     | 2013 |     | 2009–2013 |      |
|----------------|------|-----|------|------|------|------|------|-----|------|-----|-----------|------|
| Severe Cases   | N    | R   | N    | R    | N    | R    | N    | R   | N    | R   | N         | R    |
| 0–11           | 24   | 3.9 | 225  | 36.2 | 18   | 3.8  | 10   | 2.3 | 4    | 0.9 | 281       | 10.9 |
| 12–23          | 23   | 3.7 | 185  | 30   | 72   | 15.3 | 26   | 5.3 | 8    | 1.6 | 314       | 11.7 |
| 24–35          | 16   | 2.6 | 92   | 14.9 | 40   | 8.5  | 5    | 1.0 | 2    | 0.4 | 155       | 5.8  |
| 36–47          | 10   | 1.6 | 44   | 7.1  | 30   | 6.4  | 9    | 1.8 | 1    | 0.2 | 94        | 3.5  |
| 48–59          | 2    | 0.3 | 15   | 2.4  | 12   | 2.5  | 3    | 0.6 | 5    | 1.0 | 37        | 1.4  |
| 60–71          | 1    | 0.2 | 12   | 1.9  | 2    | 0.4  | 2    | 0.4 | 0    | 0   | 17        | 0.6  |
| ≥72            | 0    | 0   | 5    | 0    | 5    | 0    | 1    | 0   | 0    | 0   | 11        | 0    |
| Dead Cases     |      |     |      |      |      |      |      |     |      |     |           |      |
| 0–11           | 4    | 0.6 | 13   | 2.1  | 7    | 1.5  | 8    | 1.8 | 2    | 0.5 | 34        | 1.3  |
| 12–23          | 2    | 0.3 | 11   | 1.8  | 6    | 1.3  | 7    | 1.4 | 0    | 0   | 26        | 1.0  |
| 24–35          | 2    | 0.3 | 5    | 0.8  | 7    | 1.5  | 1    | 0.2 | 0    | 0   | 15        | 0.6  |
| 36–47          | 0    | 0   | 0    | 0    | 1    | 0.2  | 0    | 0   | 0    | 0   | 1         | 0    |
| 48–59          | 0    | 0   | 0    | 0    | 0    | 0    | 0    | 0   | 0    | 0   | 0         | 0    |
| 60–71          | 0    | 0   | 0    | 0    | 0    | 0    | 0    | 0   | 0    | 0   | 0         | 0    |
| ≥72            | 0    | 0   | 0    | 0    | 0    | 0    | 0    | 0   | 0    | 0   | 0         | 0    |

N: number; ms: months; R: incidence rate (1/100,000). The age group population in 2013 was defined as the denominator to calculate the standardized incidence rate.

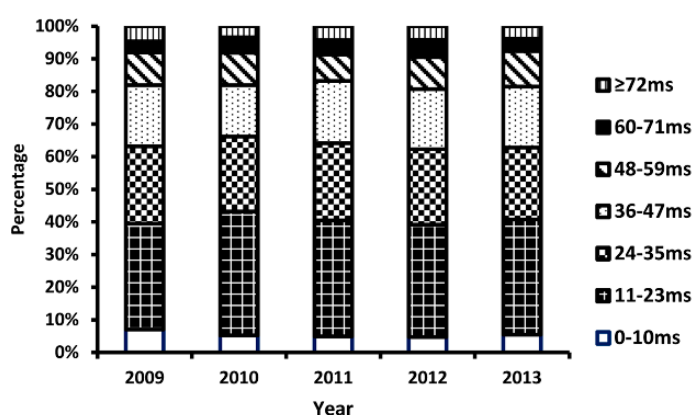

**Figure S1.** Percentage of reported EV71 cases by age group, 2009–2013.

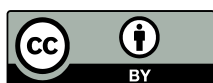

© 2016 by the authors. Submitted for possible open access publication under the terms and conditions of the Creative Commons Attribution (CC-BY) license (<http://creativecommons.org/licenses/by/4.0/>).
